# Supplementary material
Source: Springer Nature journal article supplement (https://www.springermedizin.de/resource/supplementary/12943_2013_1277_MOESM1_ESM.pdf/9553196)
Supplement: MOESM1 [file 9553196]

**miR-375 activates p21 and suppresses telomerase activity by coordinately  
regulating HPV E6/E7, E6AP, CIP2A, and 14-3-3 $\zeta$**

Hyun Min Jung<sup>1</sup>, Brittany L. Phillips<sup>1</sup>, Edward K. L. Chan<sup>1</sup>

<sup>1</sup>Department of Oral Biology, University of Florida, 1395 Center Drive, Gainesville, FL 32610,  
USA

Additional File

Figure S1-2

Table S1

## Figure S1

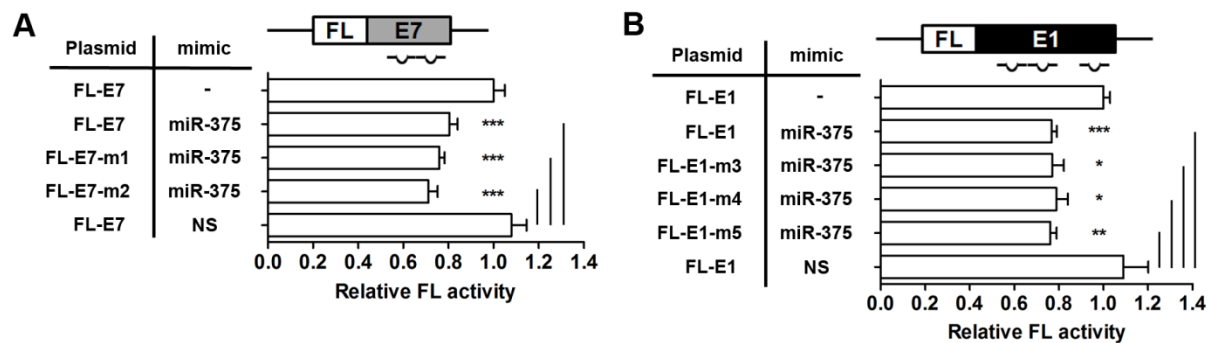

**Figure S1.** Mutation of single miR-375 binding site does not abolish the repression effect. (A) miR-375 interaction with E7 region was determined by relative FL expression from cells transfected with FL-E7 with or without miR-375-mimic transfection. Two individual mutations for putative miR-375 binding sites were generated (FL-E7-m1 or FL-E7-m2). (B) miR-375 interaction with E1 region was similarly determined. Three individual mutations were generated for each miR-375 binding site (FL-E1-m3, FL-E1-m4, and FL-E1-m5).

**Figure S2**

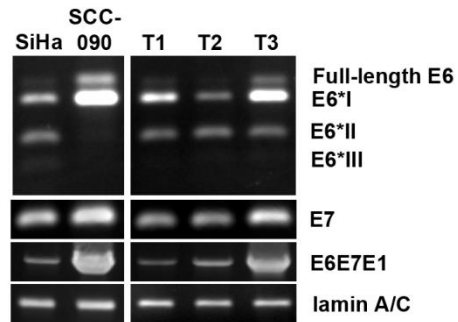

**Figure S2.** PCR amplification of E6, E7, and E6E7E1 transcripts in SiHa, SCC090, and three HPV16 positive oropharyngeal tumors (T1-T3). Lamin A/C was measured for internal control.

**Table S1.** Primer sequences for cloning and mutagenesis

| Primer name                          | Sequences                                                                   |
|--------------------------------------|-----------------------------------------------------------------------------|
| HPV16-E7-F<br>(for cloning)          | 5'-ggaattccatgcatgcagatacacctaca-3'                                         |
| HPV16-E7-R<br>(for cloning)          | 5'-gatcgcgccgcttaggtttctgagaacagatgg-3'                                     |
| HPV16-E7-m1-F<br>(for mutagenesis)   | 5'-aatagatggtccagctggacattgtgaaccggacagagcccattac-3'                        |
| HPV16-E7-m1-R<br>(for mutagenesis)   | 5'-gtaatgggctctgtccggttcacaatgtccagctggaccatctatt-3'                        |
| HPV16-E7-m2-F<br>(for mutagenesis)   | 5'-gtccagctggacaagcagaacccgtgtgagcccattacaatattgtaac-3'                     |
| HPV16-E7-m2-R<br>(for mutagenesis)   | 5'-gttacaatattgtaatgggctcacacgggttctgcttccagctggac-3'                       |
| HPV16-E7-m1-2-F<br>(for mutagenesis) | 5'-ggttacaatattgtaatgggctcacaccgggttcaccatgtccagctggaccatctatttc-3'         |
| HPV16-E7-m1-2-R<br>(for mutagenesis) | 5'-gaaatagatggtccagctggacatggtgaaccgggtgtgagcccattacaatattgtaacc-3'         |
| HPV16-E1-F<br>(for cloning)          | 5'-ctaggaattcaatgggcctacgataatga-3'                                         |
| HPV16-E1-R<br>(for cloning)          | 5'-gatcgcgccgctcataatgtgttagtattttgtcc-3'                                   |
| HPV16-E1-m3-F<br>(for mutagenesis)   | 5'-tgtgcaacaatgtgtagacattataaacgagcagaaaaaatggtatgagatgagtcaatggataaaata-3' |
| HPV16-E1-m3-R<br>(for mutagenesis)   | 5'-tattttatccattgactcatactcataacattttttctgctcgtttataatgtctacacattgtgcaca-3' |
| HPV16-E1-m4-F<br>(for mutagenesis)   | 5'-cagaaaaaaaacaaatgagatgagtcaatcgttttaatatagatgtgatagggtagatgatggag-3'     |
| HPV16-E1-m4-R<br>(for mutagenesis)   | 5'-ctccatcatctaccctatcacatctatattaaaacgattgactcatactcattgttttttctg-3'       |
| HPV16-E1-m5-F<br>(for mutagenesis)   | 5'-attaagttgcacgaggacgaggtgttgaaaacgatggagactctttgc-3'                      |
| HPV16-E1-m5-R<br>(for mutagenesis)   | 5'-gcaaagagtctccatcgttttccaacacctcgtcctcgtgcaaacttaac-3'                    |
